# Supplementary material
Source: PubMed Central journal article supplement (PMC3957735)
Supplement: 78.1.40_zmr999092351so1.pdf [file 78.1.40_zmr999092351so1.pdf]

## 1 **Supplemental information**

2

### 3 **Bioinformatic multi-species DNA damage proteome analysis**

4 For identification of the ortholog sequences related to DNA damage presented in this  
5 paper, we first started by using the list of human DNA damage proteins catalogued by  
6 the group of Rick Wood  
7 ([http://sciencepark.mdanderson.org/labs/wood/DNA\\_Repair\\_Genes.html#Human%20DNA%20Repair%20Genes](http://sciencepark.mdanderson.org/labs/wood/DNA_Repair_Genes.html#Human%20DNA%20Repair%20Genes)). We then run BLAST using all the human DNA damage  
8 proteins (129 proteins listed in Table 1 to 5 and Table S1 to S3) on the proteome of all  
9 the selected species used in this work (2). The version of the build for the proteome of  
10 every species is presented in supplementary Table 1. For two proteins to be considered  
11 ortholog, we are requiring that they both are in the top 5 reciprocal best BLAST hits of  
12 one another. For example, when BLASTing the human protein A on the proteome of  
13 *L.major*, if the best hit is protein B then we required that protein A is in the top 5 BLAST  
14 hits of protein B in the human proteome. This is what we defined as reciprocal top 5  
15 best BLAST hits (4). We tried different values for the length of the top list to assign the  
16 reciprocal best hit and we obtained maximal concordance at top 5 with a maximum  
17 concordance of 80% for the know human yeast ortholog proteins. We repeated this  
18 entire reciprocal top 5 best BLAST hits using the yeast DNA damage proteome (94  
19 proteins listed in Table 1 to 5 and Table S1 to S3). We performed exactly the same  
20 analysis as for the human DNA damage proteome. We had to merge the results from  
21 the two analyses on the basis of the list of common ortholog proteins between human  
22 and yeast. For the merged analysis we used a color code that is depicted in Fig.S2. A

24 white square means that neither the human nor the yeast analyses were able to retrieve  
25 an ortholog. A green square means that only the human analysis was able to retrieve  
26 an ortholog. A red square means that only the yeast analysis was able to retrieve an  
27 ortholog. When both the human and yeast analysis identified the same ortholog, this is  
28 depicted by a yellow square. If the yeast and human analysis did not retrieve the same  
29 ortholog proteins this is depicted by a black square. For this study we used two different  
30 stringency values for the E-values of BLAST algorithm 0.001 and 0.05. We considered  
31 0.001 as being stringent and 0.05 as being a more permissive approach to identify  
32 ortholog sequences. The analyses as well as the figures were generated using custom  
33 Python and R scripts.

34

35 The approach we used to retrieve ortholog is different from the majority of BLAST  
36 analyses performed in the papers that we will further refer to in the remaining of this  
37 review. The major difference reside in the reciprocal portion of the BLAST analysis in  
38 which we require the putative ortholog protein to also mapped back to the query protein  
39 in human (or yeast). This step is critical to insure the putative ortholog correspond really  
40 to the best human ortholog protein. It is thus highly plausible that our systematic  
41 approach will miss some of the previously ortholog proteins identified by the community.  
42 We also mentioned we used two different stringent E-value cutoffs and this could also  
43 explain that our systematic analysis will miss previously identified ortholog due to the  
44 use of different BLAST E-values.

45

46 The phylogenetic analysis of the RAD51 paralogs was done in two steps. The first step  
47 was to obtain and align the sequences of all the putative paralog sequences for  
48 human, *S. cerevisiae*, *S. pombe* and the Trypanosomatids. We aligned the sequences  
49 using MAFFT and generated a phylogenetic tree from the alignment using Neighbor-  
50 joining with the JTT model and 500 bootstrap resampling (3). The database TriTrypDB-  
51 4.1 (1) was used for *L. infantum* (8241 proteins), *L. major Friedlin* (8412), *L. braziliensis*  
52 (8357), *T. brucei Treu927* (9826), *T. congolense* (13459), *T. cruzi Esmeraldo-Like*  
53 (10342), *T. vivax* (11885) and 03-Feb-2011-  
54 downloads.yeastgenome.org/sequence/S288C\_reference/orf\_protein/ for *S. cerevisiae*  
55 (5887), 19-Mar-2012 - ftp.sanger.ac.uk/pub/yeast/pombe/Protein\_data/ for *S. pombe*  
56 (5143) and 15-Oct-2012 - [ftp.ncbi.nih.gov/refseq/H\\_sapiens/mRNA Prot/](ftp.ncbi.nih.gov/refseq/H_sapiens/mRNA Prot/) for human  
57 (34677).

58

## 59 Supplemental References

- 60 1. **Aslett, M., C. Aurrecochea, M. Berriman, J. Brestelli, B. P. Brunk, M. Carrington,**  
61 **D. P. Depledge, S. Fischer, B. Gajria, X. Gao, M. J. Gardner, A. Gingle, G. Grant, O.**  
62 **S. Harb, M. Heiges, C. Hertz-Fowler, R. Houston, F. Innamorato, J. Iodice, J. C.**  
63 **Kissinger, E. Kraemer, W. Li, F. J. Logan, J. A. Miller, S. Mitra, P. J. Myler, V.**  
64 **Nayak, C. Pennington, I. Phan, D. F. Pinney, G. Ramasamy, M. B. Rogers, D. S.**  
65 **Roos, C. Ross, D. Sivam, D. F. Smith, G. Srinivasamoorthy, C. J. Stoeckert, Jr., S.**  
66 **Subramanian, R. Thibodeau, A. Tivey, C. Treatman, G. Velarde, and H. Wang.**  
67 2010. TriTrypDB: a functional genomic resource for the Trypanosomatidae. *Nucleic*  
68 *Acids Res* **38**:D457-462.
- 69 2. **Camacho, C., G. Coulouris, V. Avagyan, N. Ma, J. Papadopoulos, K. Bealer, and T.**  
70 **L. Madden.** 2009. BLAST+: architecture and applications. *BMC Bioinformatics*  
71 **10**:421.
- 72 3. **Katoh, K., and D. M. Standley.** 2013. MAFFT multiple sequence alignment software  
73 version 7: improvements in performance and usability. *Molecular biology and*  
74 *evolution* **30**:772-780.
- 75 4. **Stuart, J. M., E. Segal, D. Koller, and S. K. Kim.** 2003. A gene-coexpression network  
76 for global discovery of conserved genetic modules. *Science* **302**:249-255.
- 77

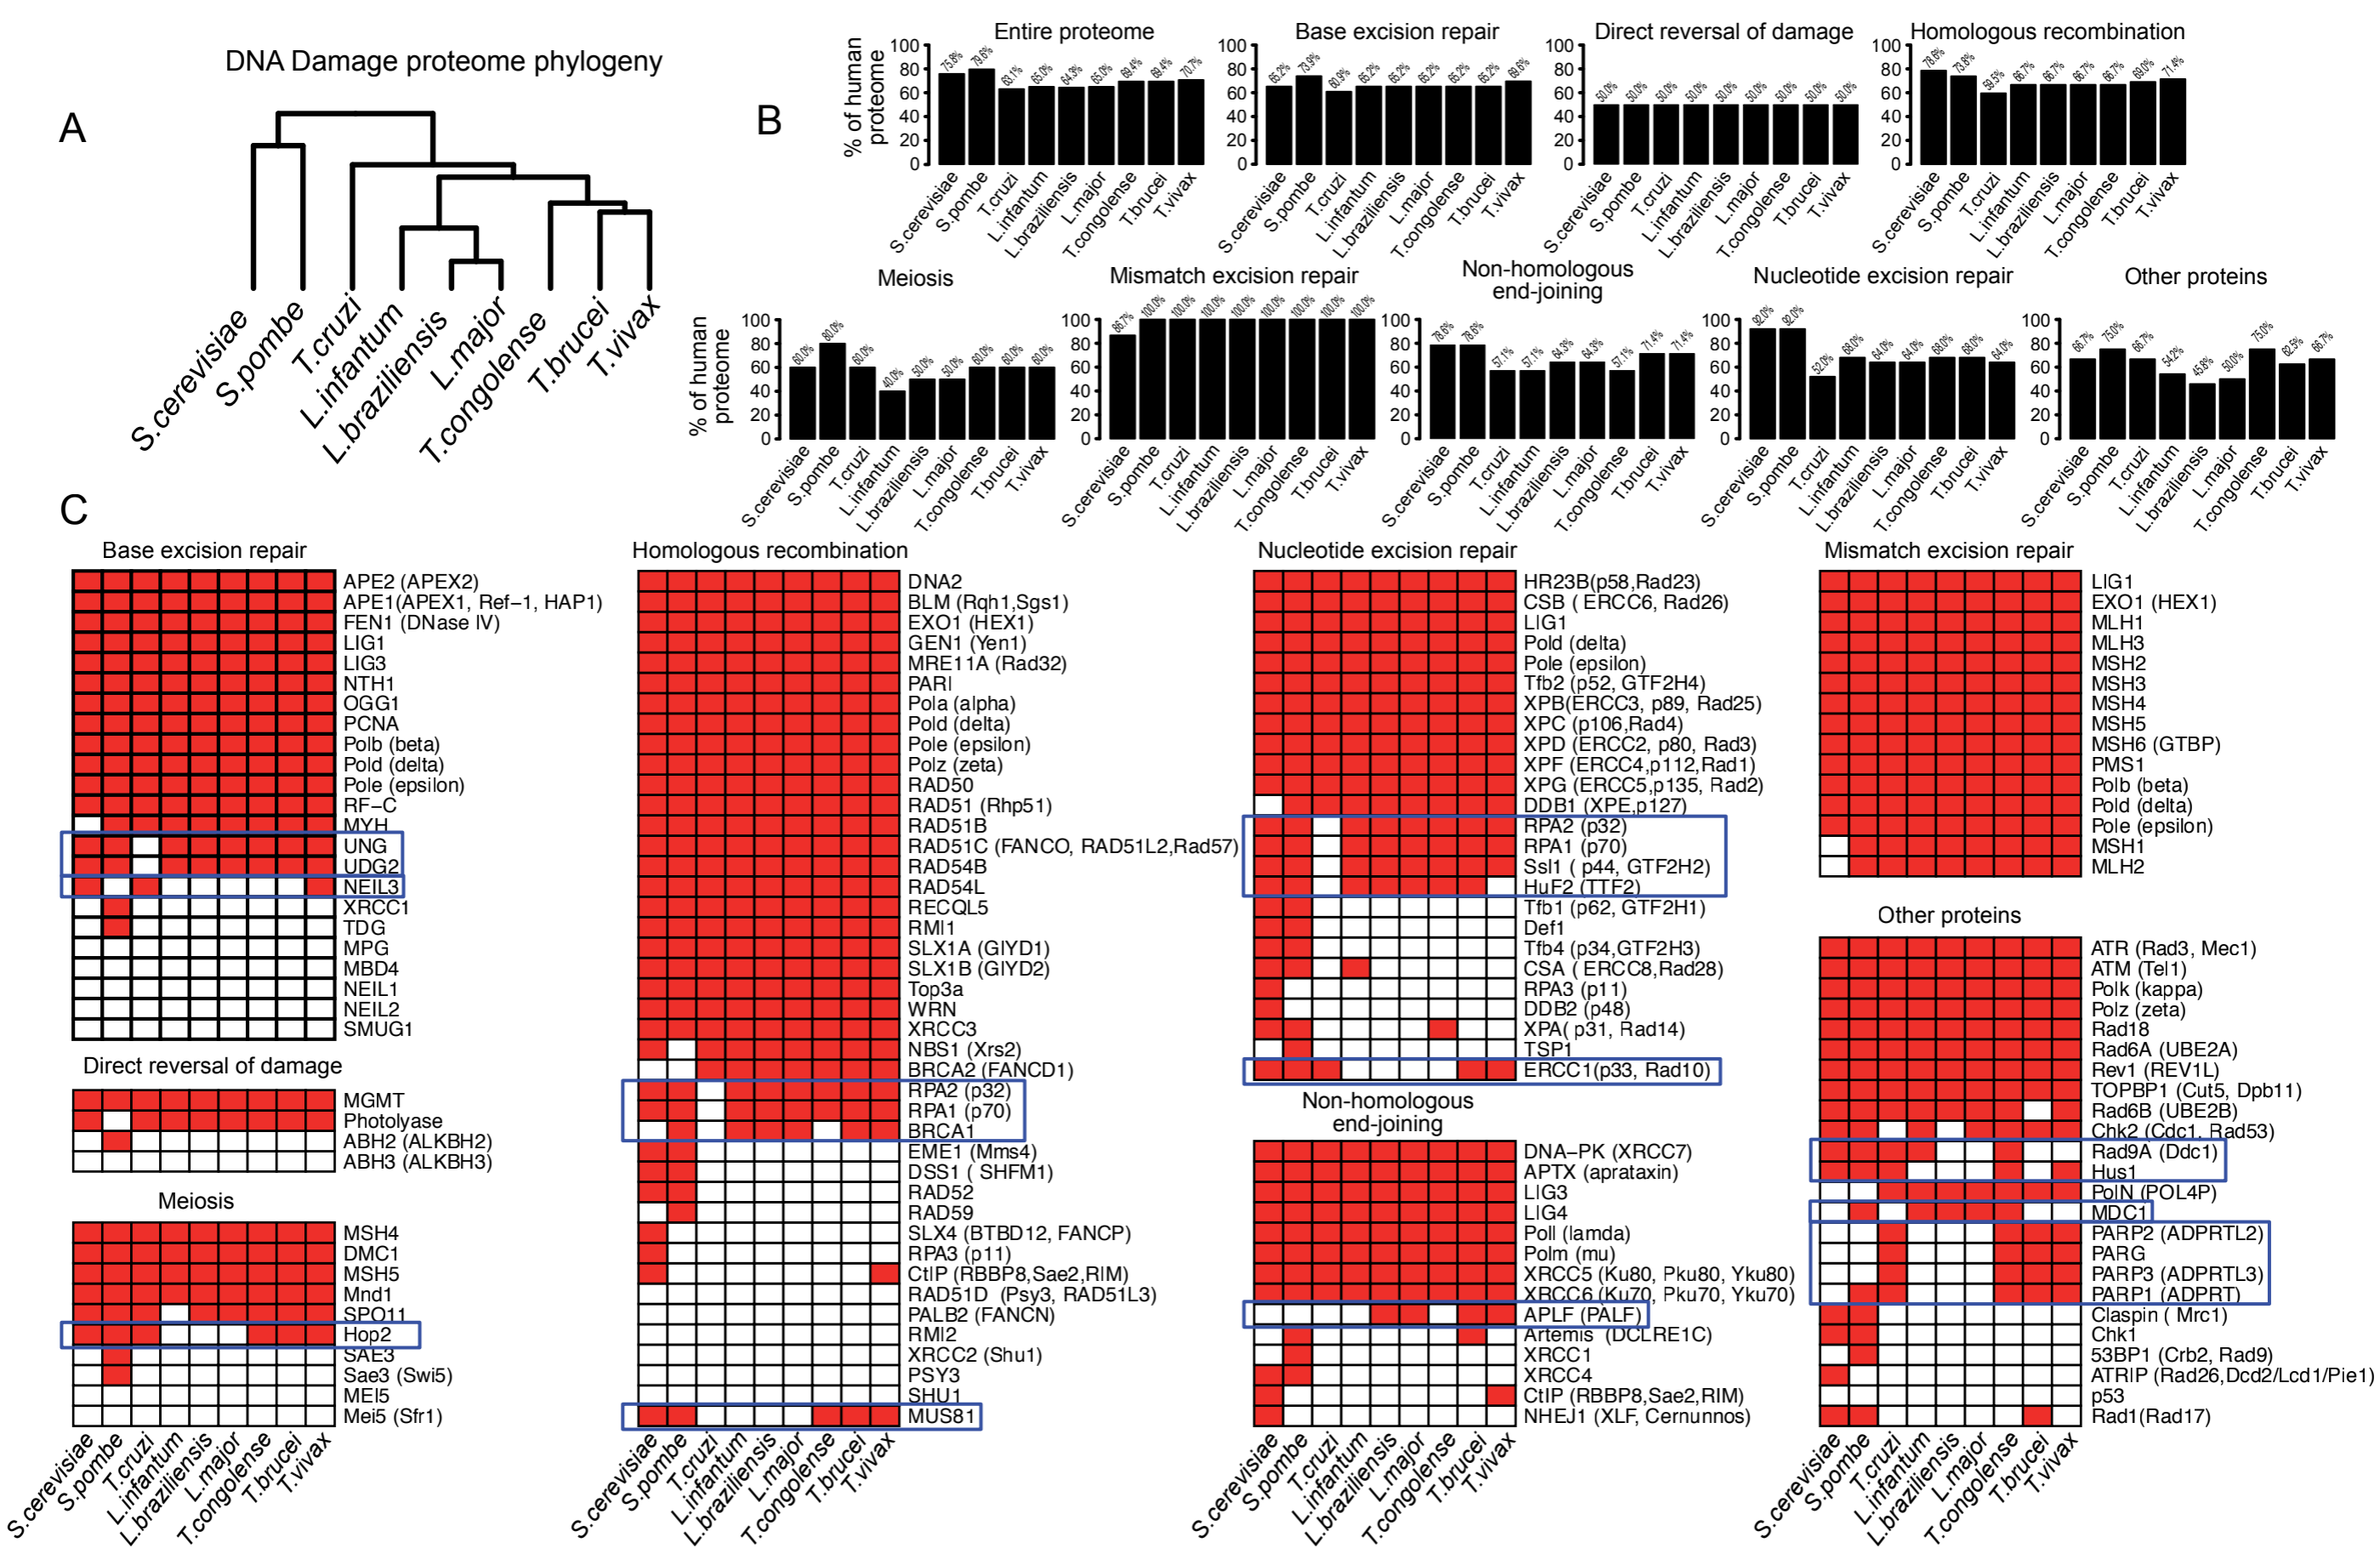

**FIG S1** Summary for the bioinformatics analyses using BLAST E-value < 0.05. A) Complete hierarchical clustering using Euclidean distance of the list of retrieved DNA damage proteins in the different species analysed in the bioinformatics analysis. B) Barplots presenting the different percentage of proteins retrieved in the different DNA damage categories for all the species analyzed using E-value < 0.05. C) Heatmaps presenting the retrieved proteins (red square) for all the species in all the different DNA damage categories. Blue rectangles surrounded proteins that are only detected partially in the Trypanosomatids.

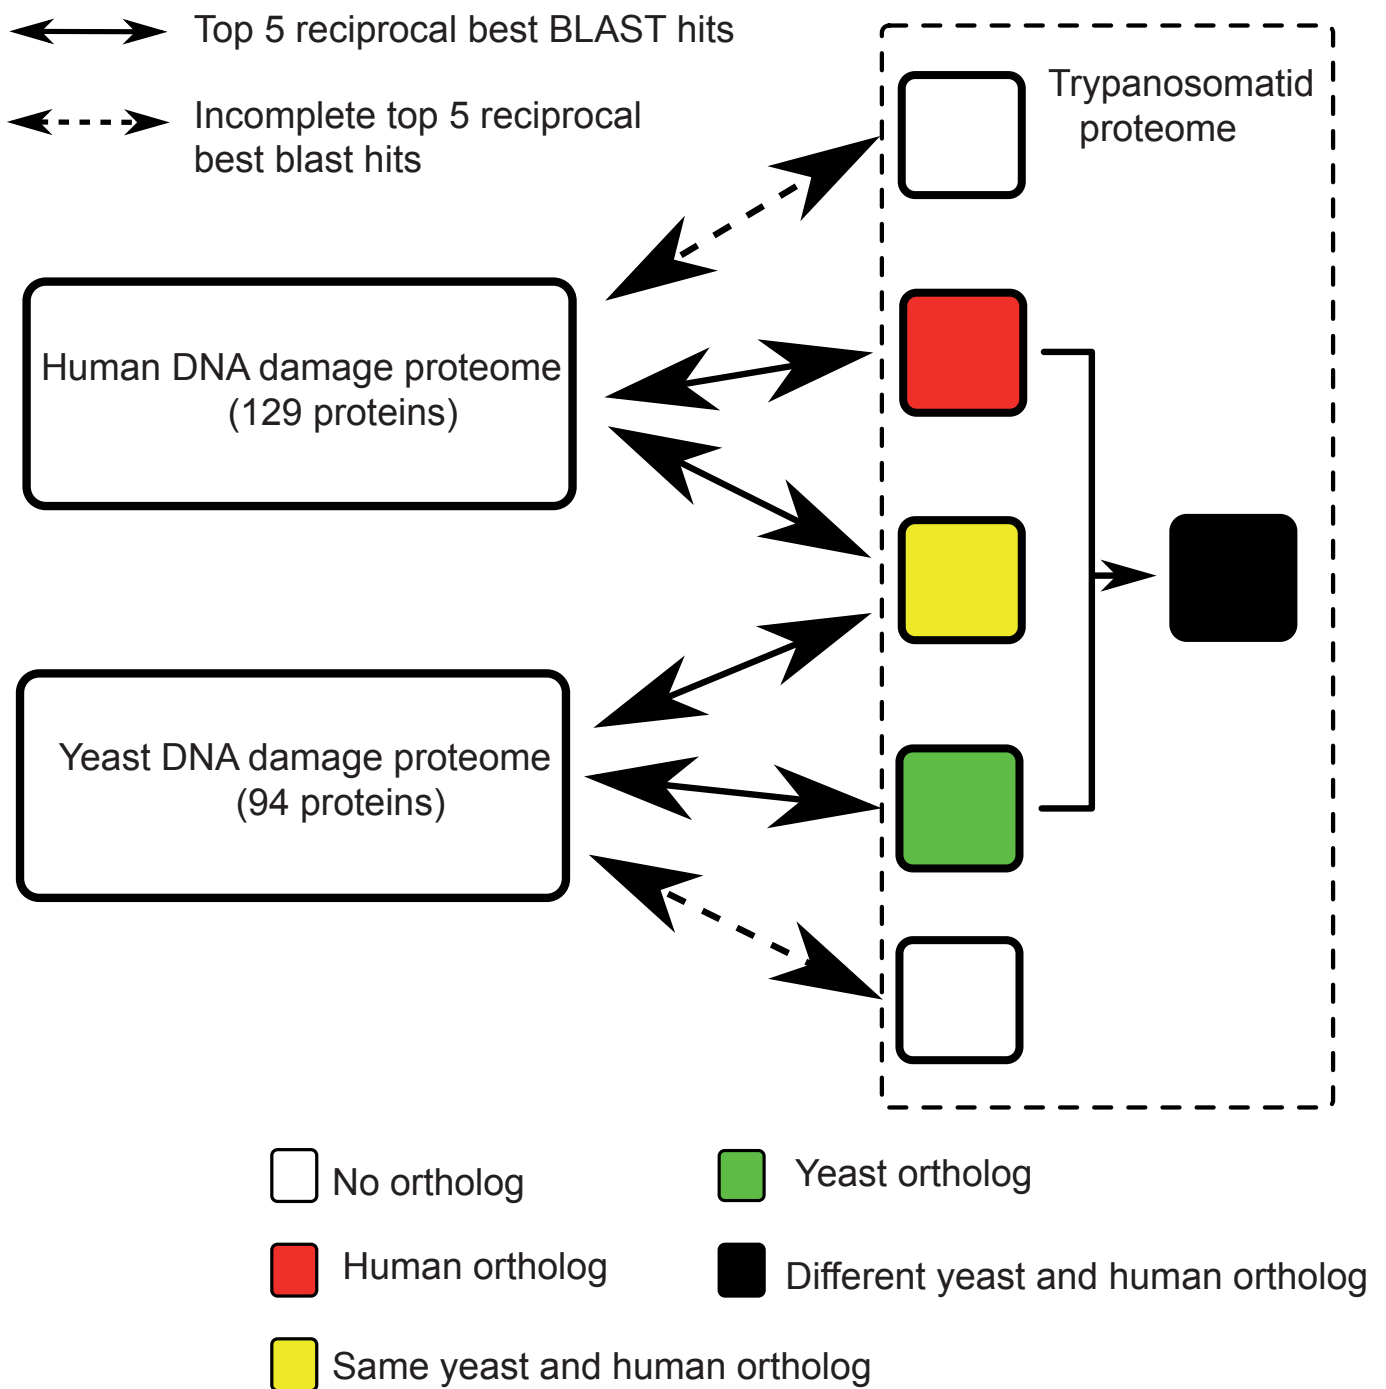

**FIG S2** The top 5 reciprocal best BLAST hits approach used in this paper to retrieve bioinformatically the ortholog proteins in the other species. We used both the human and the yeast DNA damage proteome containing respectively 129 and 94 proteins. The arrows represent the reciprocal best hits approach and the different squares represent the different outcomes following the yeast and human analysis.

### Base excision repair (BER)

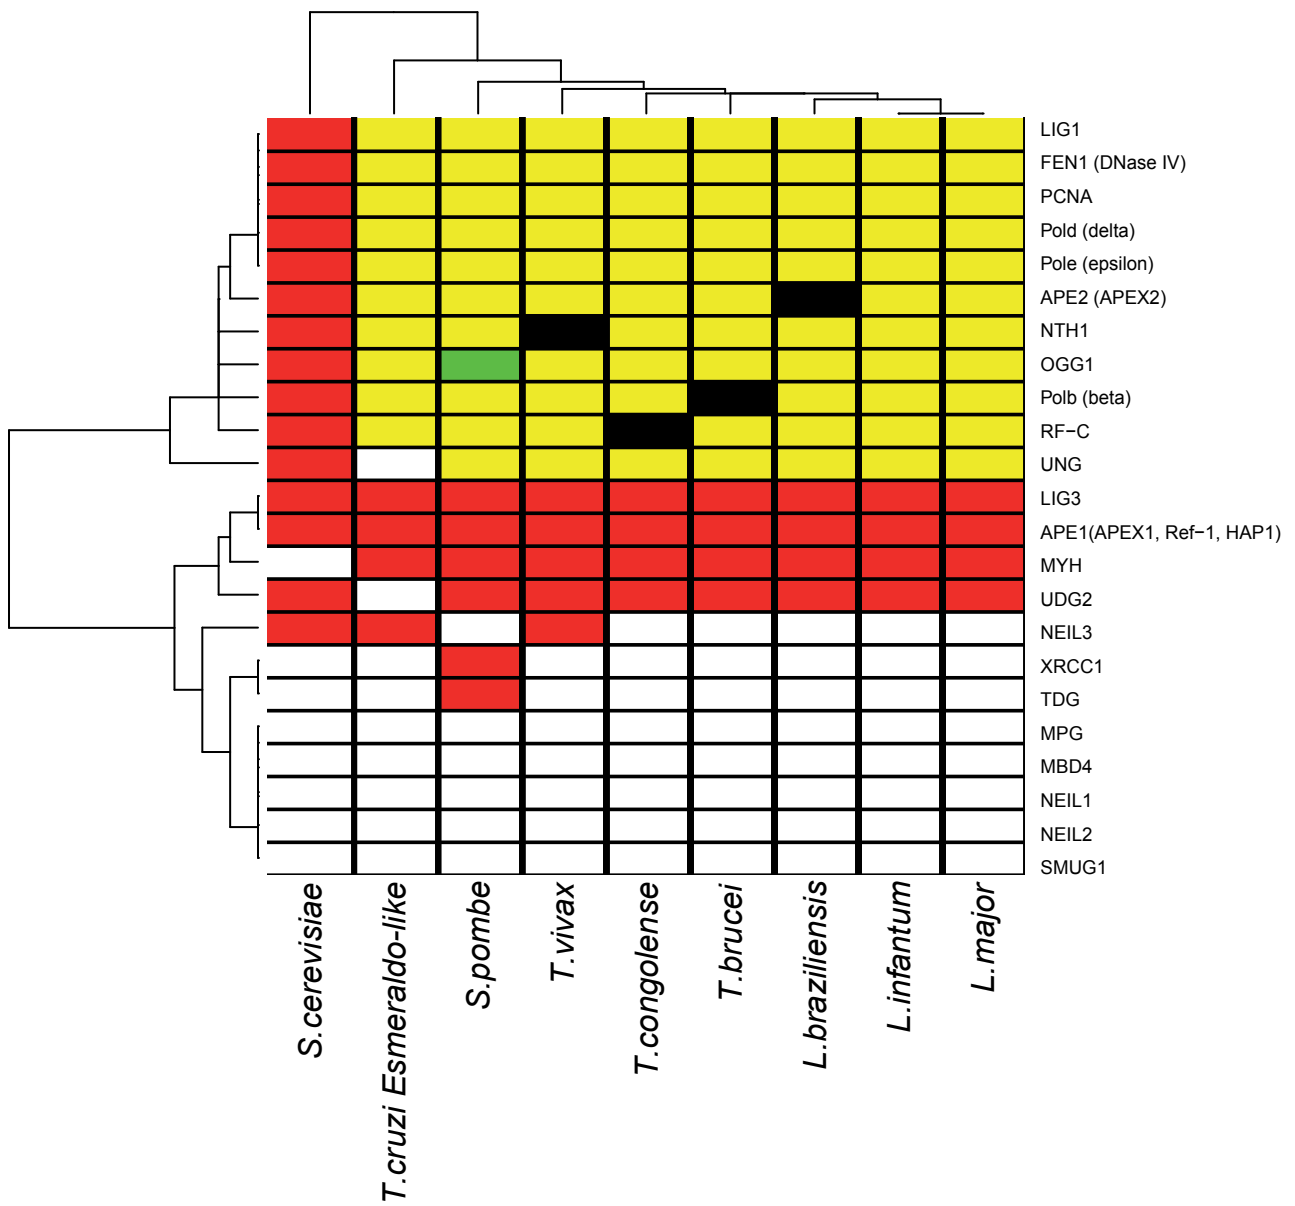

**FIG S3** Base excision repair homologs in Trypanosomatids. White boxes represent no mapping; red represents human mapping only; green represent budding yeast mapping only; yellow represent both human and yeast mapping; If the yeast and human analysis did not retrieve the same ortholog proteins this is depicted by a black square.

Others proteins involved in DNA repair

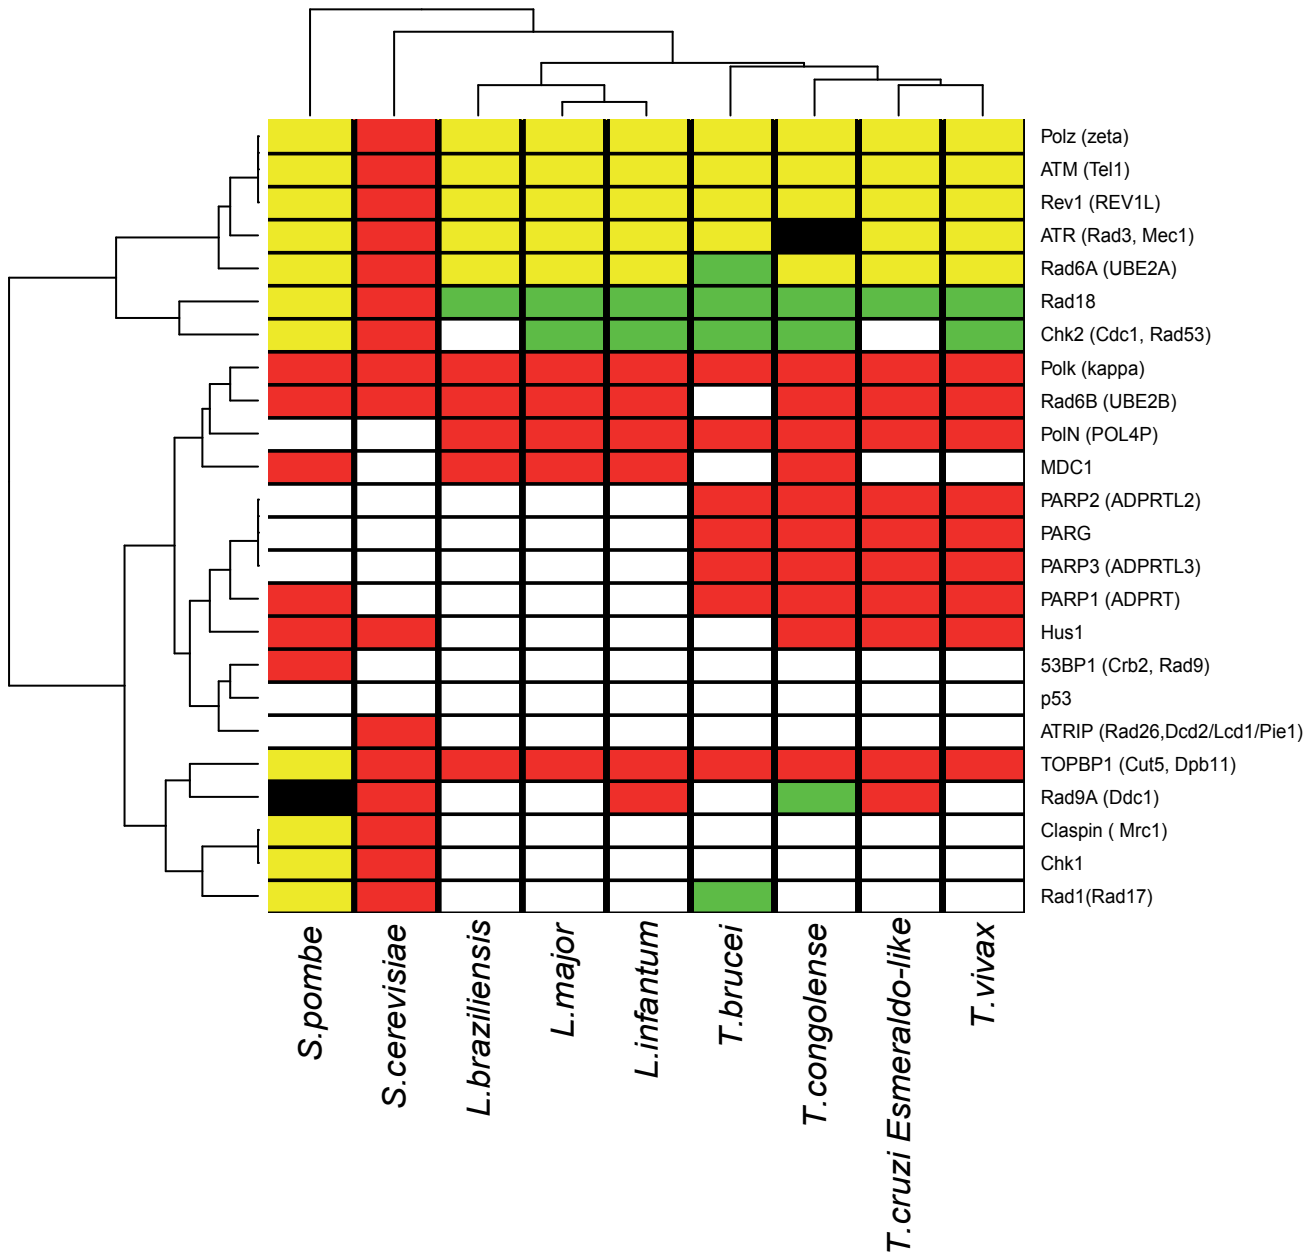

**FIG S4** Other proteins involved in DNA repair in Trypanosomatids. White boxes represent no mapping; red represents human mapping only; green represent budding yeast mapping only; yellow represent both human and yeast mapping; If the yeast and human analysis did not retrieve the same ortholog proteins this is depicted by a black square.

### Mismatch excision repair (MMR)

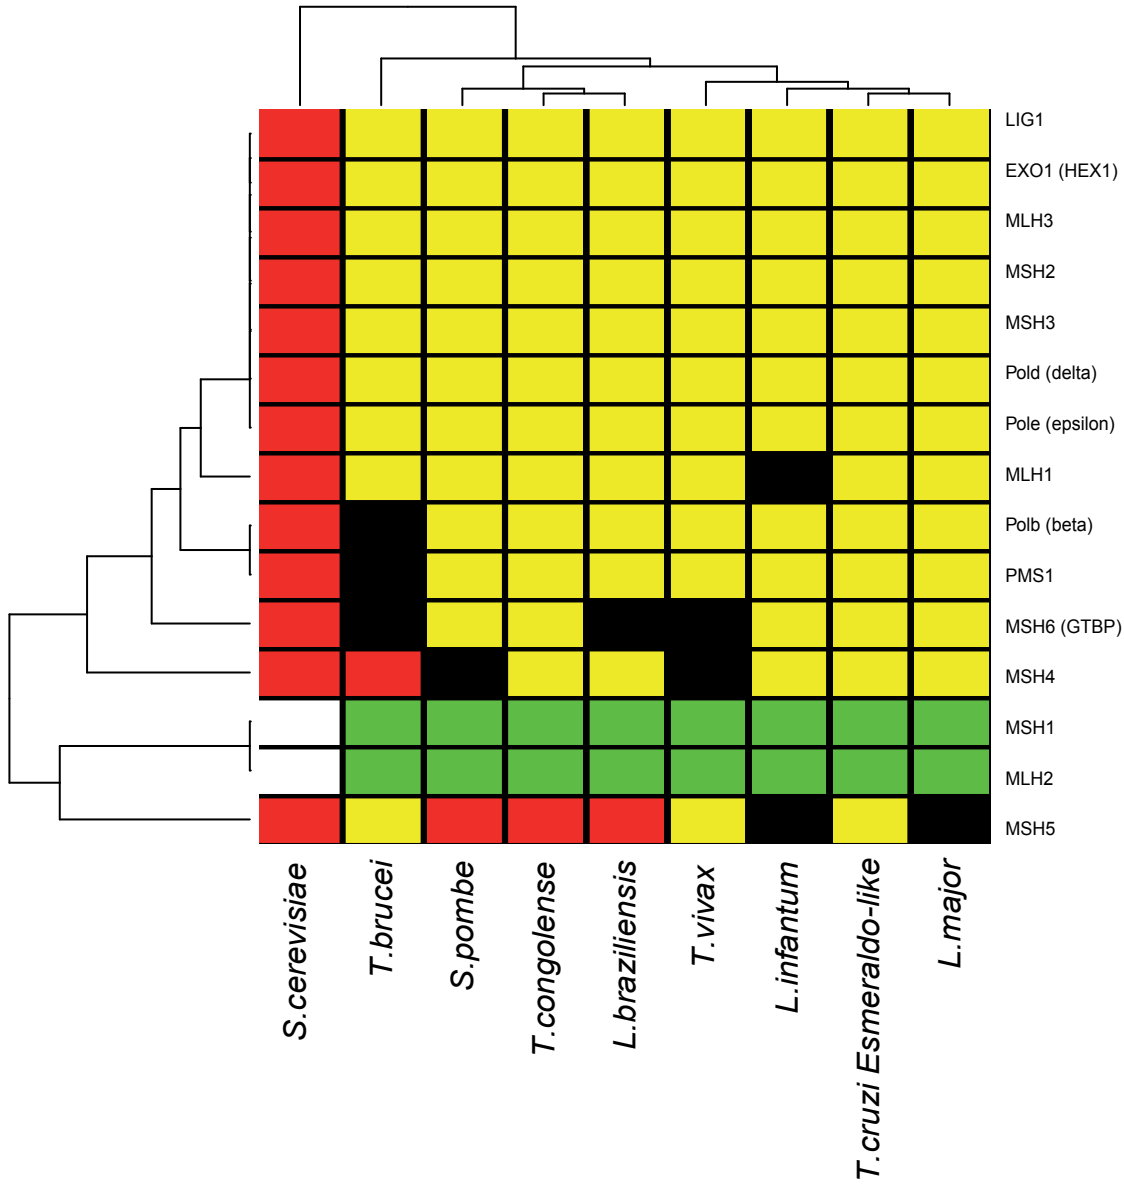

**FIG S5** Mismatch repair homologs in Trypanosomatids. White boxes represent no mapping; red represents human mapping only; green represent budding yeast mapping only; yellow represent both human and yeast mapping; If the yeast and human analysis did not retrieve the same ortholog proteins this is depicted by a black square.



### Non-homologous end-joining

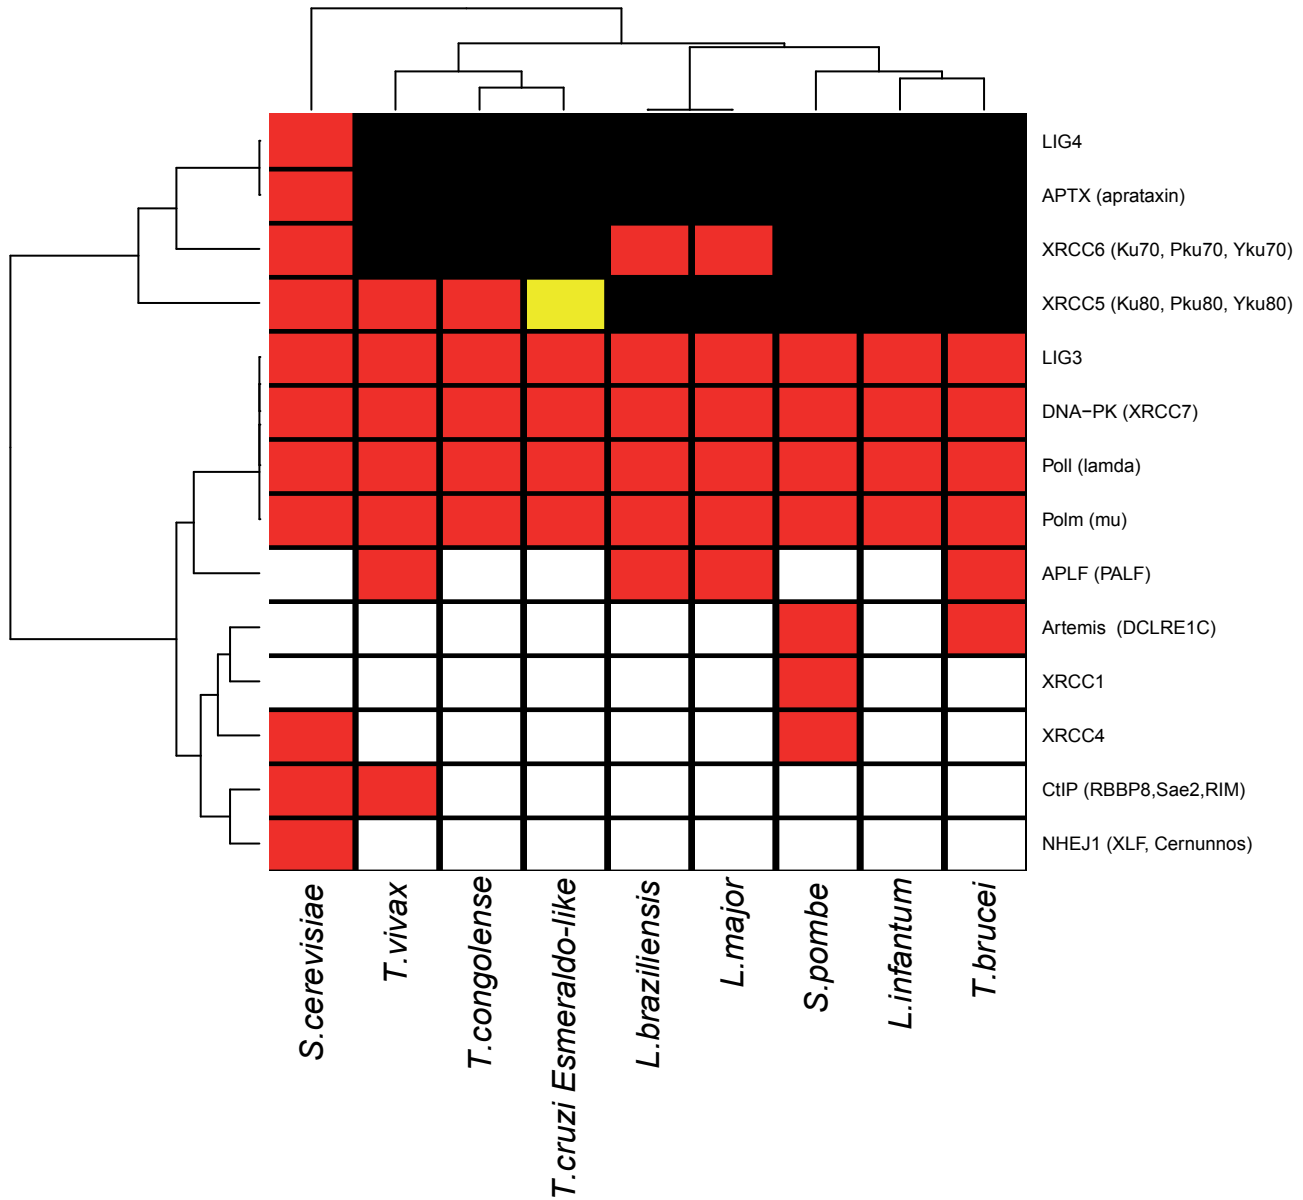

**FIG S6** Non-homologous end joining homologs in Trypanosomatids. White boxes represent no mapping; red represents human mapping only; green represent budding yeast mapping only; yellow represent both human and yeast mapping; If the yeast and human analysis did not retrieve the same ortholog proteins this is depicted by a black square.



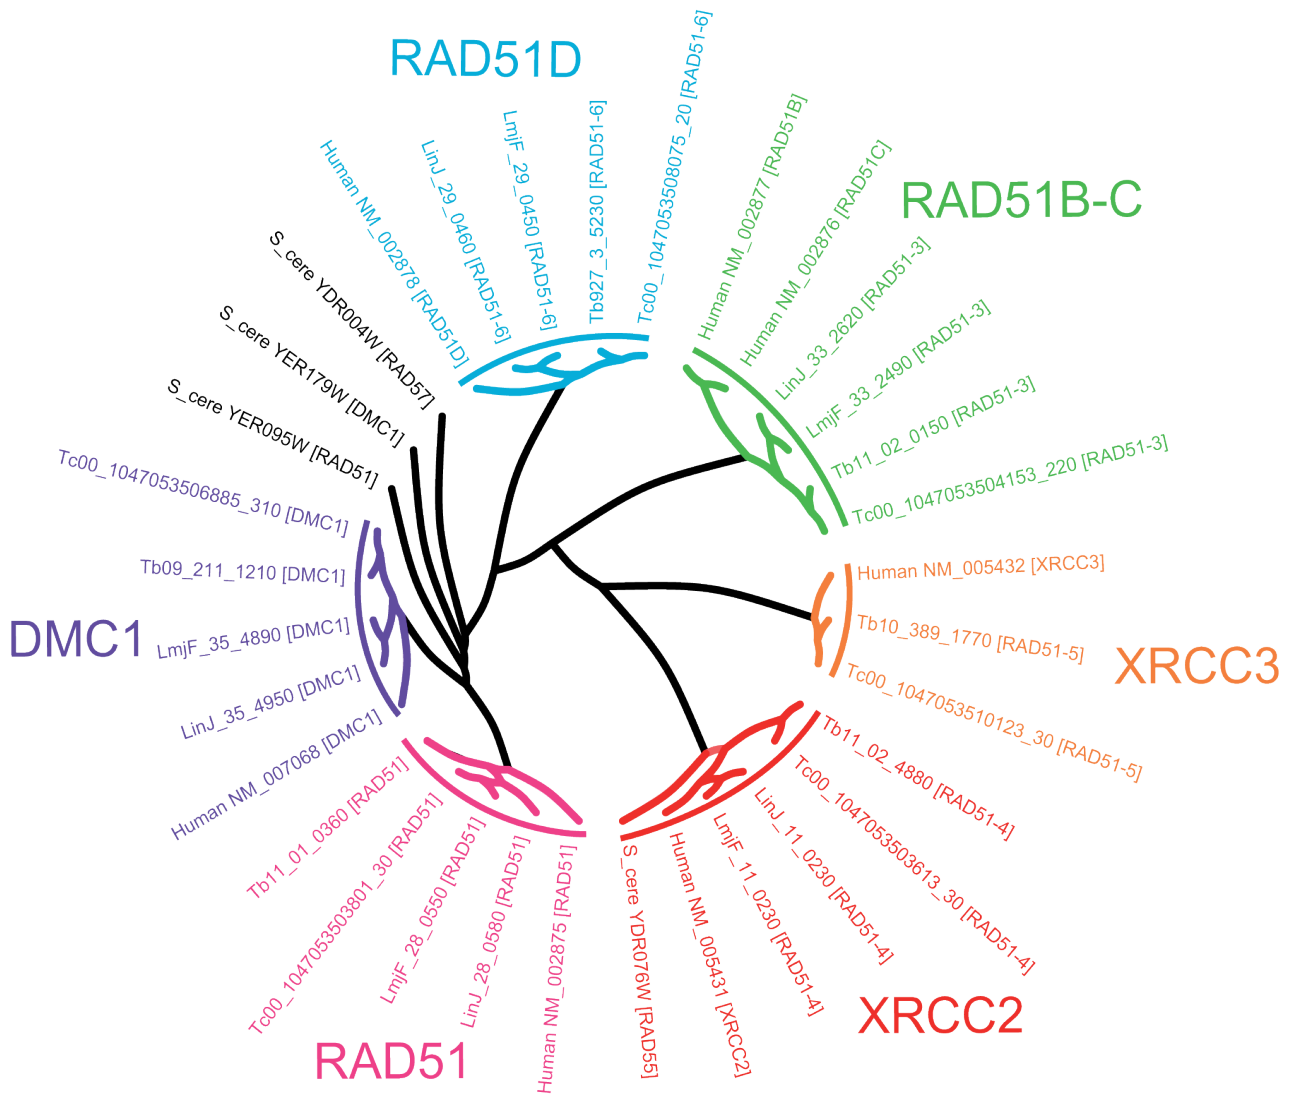

**FIG S7B** The phylogenetic analysis of the RAD51 family proteins in human, *S.cerevisiae*, *Leishmania infantum*, *Leishmania major*, *Trypanosoma brucei*, and *Trypanosoma cruzi*.

### Meiosis

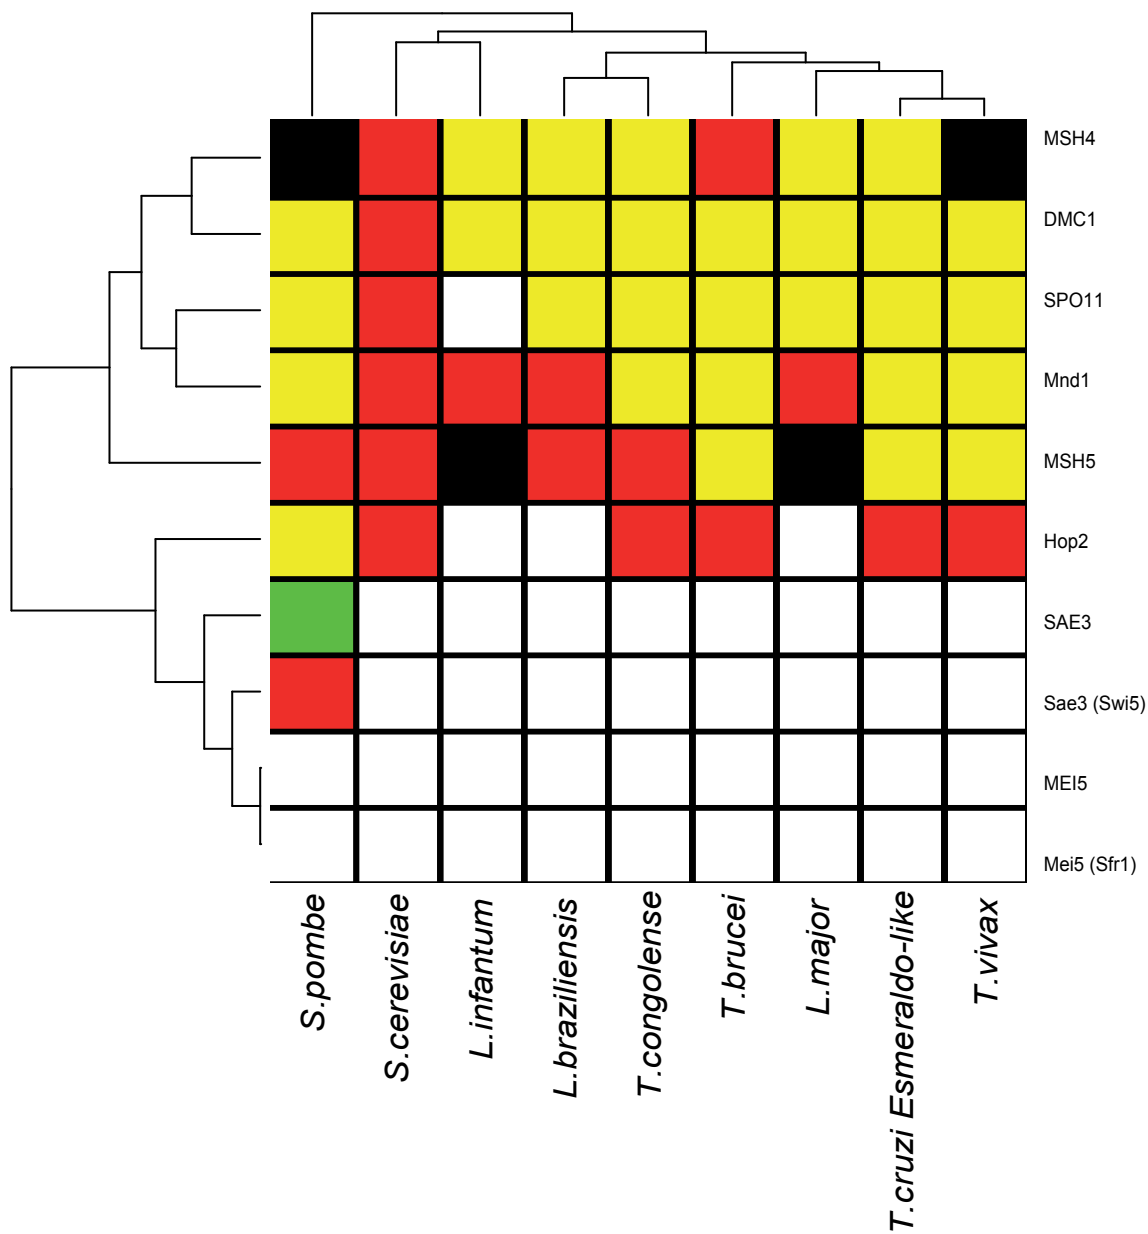

**FIG S8** Putative meiotic proteins in Trypanosomatids. White boxes represent no mapping; red represents human mapping only; green represent budding yeast mapping only; yellow represent both human and yeast mapping; If the yeast and human analysis did not retrieve the same ortholog proteins this is depicted by a black square.

Direct reversal of damage

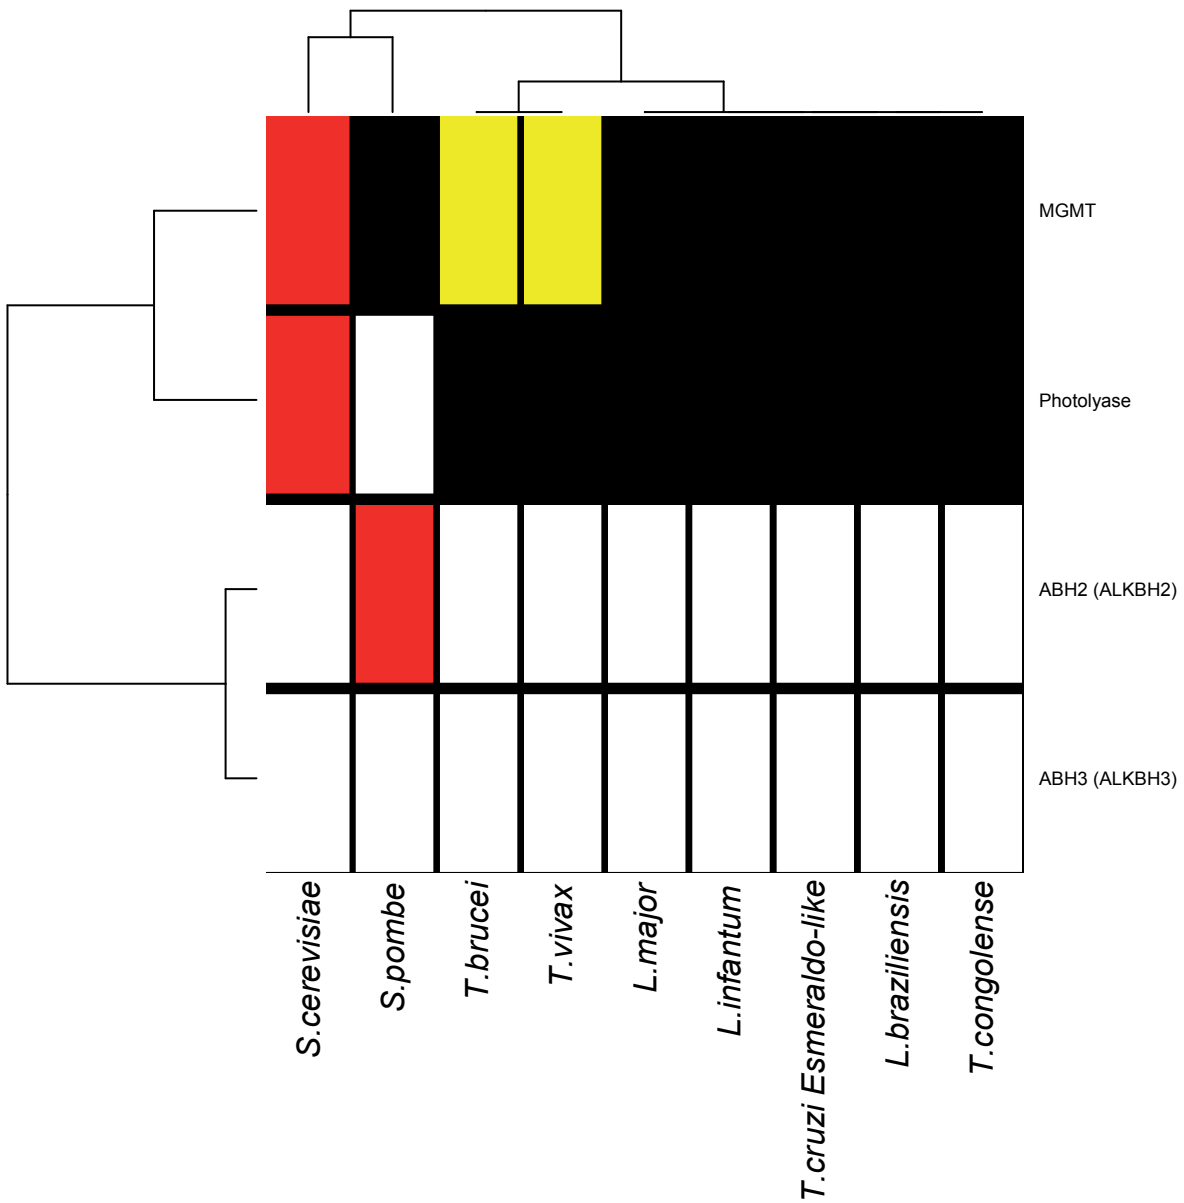

**FIG S9** Direct reversal of damage proteins in Trypanosomatids. White boxes represent no mapping; red represents human mapping only; green represent budding yeast mapping only; yellow represent both human and yeast mapping; If the yeast and human analysis did not retrieve the same ortholog proteins this is depicted by a black square.

### Nucleotide excision repair (NER)

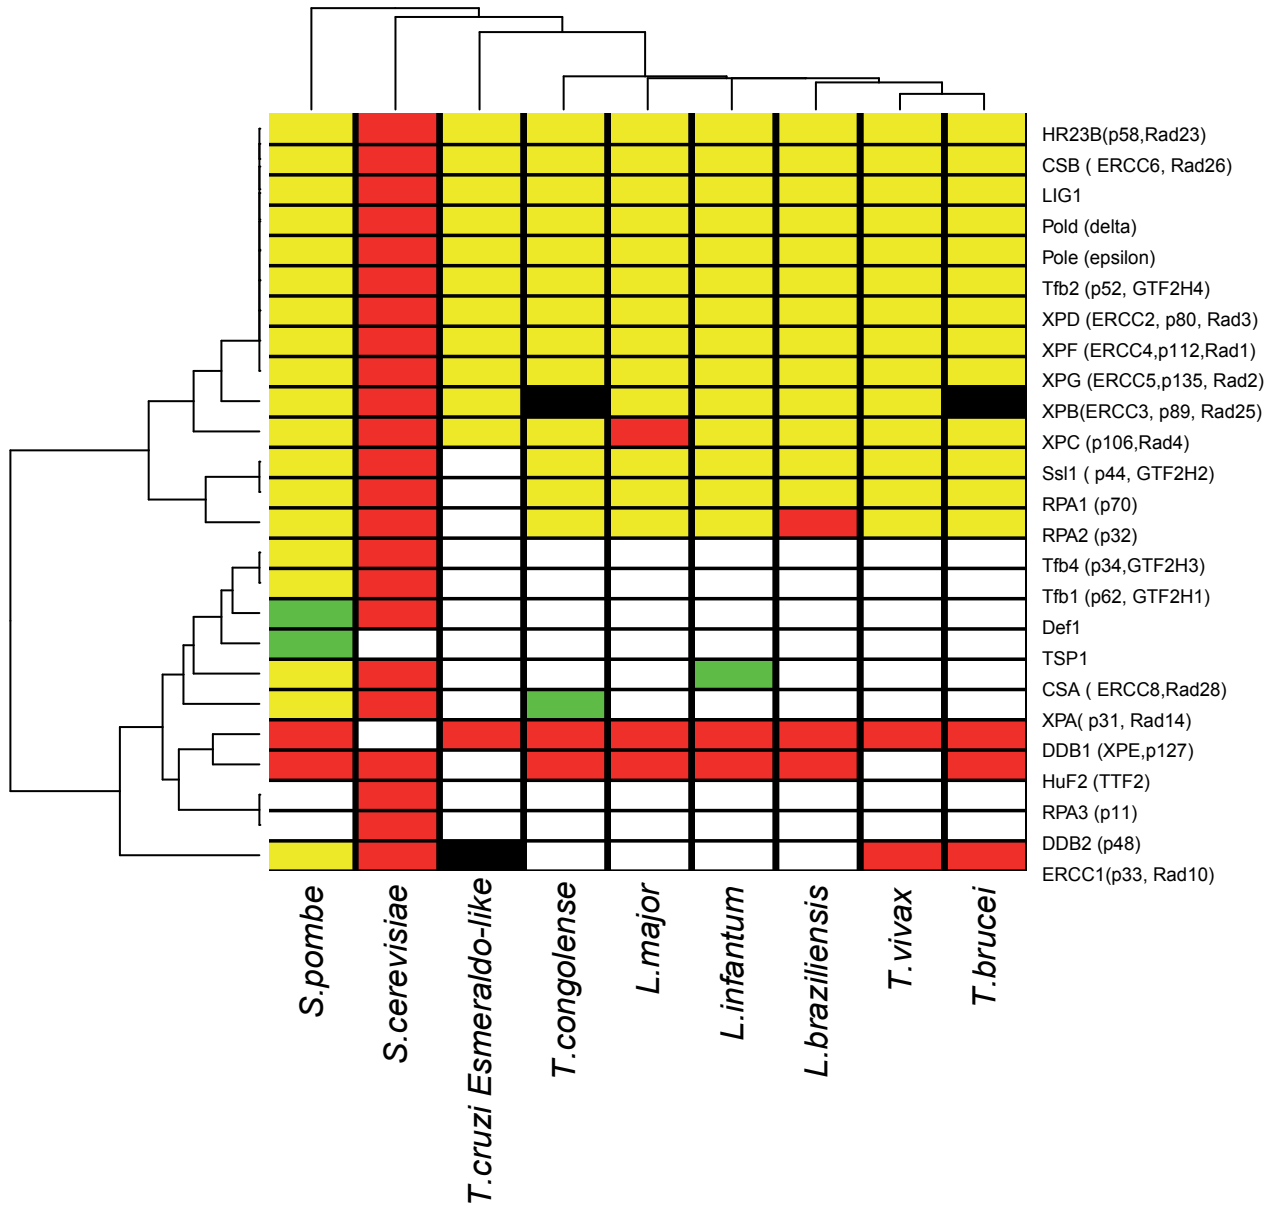

**FIG S10** Nucleotide excision repair proteins in Trypanosomatids. White boxes represent no mapping; red represents human mapping only; green represent budding yeast mapping only; yellow represent both human and yeast mapping; If the yeast and human analysis did not retrieve the same ortholog proteins this is depicted by a black square.

**Table S1** List of Trypanosomatids genes involved in direct repair included functions and ID.

| Name ( other name) | Fonction                                            | Gene ID      |              |                 |                  |                  |                    |                            |
|--------------------|-----------------------------------------------------|--------------|--------------|-----------------|------------------|------------------|--------------------|----------------------------|
|                    |                                                     | Human        | S.cerevisiae | S.pombe         | L.infantum       | L.major          | T.brucei           | T.cruzi                    |
| MGMT               | O6-methylguanine-methyltransferase                  | NM_002412    | YDL200C      | SPAC1250.04c(B) | LinJ.26.1800(B)  | LmjF.26.1800 (B) | Tb09.160.1490 (Y)  | Tc00.1047053508347.20 (B)  |
| ABH2 (ALKBH2)      | Dioxygenase able to revert N-alkyl adducts          | NM_001001655 | X            | SPAP8A3.02C (H) | X                | X                | X                  | X                          |
| ABH3 (ALKBH3)      | Dioxygenase able to revert N-alkyl adducts          | NM_139178    | X            | X               | X                | X                | X                  | X                          |
| Photolyase         | Photoinduce repair of cyclobutane pyrimidine dimers | NM_004075    | YOR386W      | X               | LinJ.33.0480 (B) | LmjF.33.0470 (B) | Tb927.10.11100 (B) | Tc00.1047053511127.260 (B) |

(H) represents found from human homolog only

(Y) represents found from yeast homolog only

(B) means both found from human and yeast homologs

(X) means no homolog

**Table S2** List of Trypanosomatids genes involved in nucleotide excision repair (NER) included functions and ID.

| Name ( other name)               | Fonction                                                                                  | Gene ID   |              |                  |                  |                 |                                    |                           |
|----------------------------------|-------------------------------------------------------------------------------------------|-----------|--------------|------------------|------------------|-----------------|------------------------------------|---------------------------|
|                                  |                                                                                           | Human     | S.cerevisiae | S.pombe          | L.infantum       | L.major         | T.brucei                           | T.cruzi                   |
| XPA (p31, Rad14)                 | Xeroderma pigmentosum A: damage recognition                                               | NM_000380 | YMR201C      | SPBC649.03(B)    | X                | X               | X                                  | X                         |
| XPC (p106, Rad4)                 | Xeroderma pigmentosum C: recruitment of TFIIH                                             | NM_004628 | YER162C      | SPCC4G3.10c(B)   | LinJ.35.3500(B)  | LmjF.35.3450(H) | Tb09.211.3040(B)                   | Tc00.1047053507011.140(B) |
| HR23B (p58, Rad23)               | In complex with XPC, recruitment of TFIIH                                                 | NM_005053 | YEL037C      | SPBC2D10.12(B)   | LinJ.30.3350(B)  | LmjF.30.3300(B) | Tb927.6.4650(B)                    | Tc00.1047053511731.10(B)  |
| TFIIH-XPB (ERCC3/p89/Rad25/Ssl2) | Transcription factor : DNA unwinding                                                      | NM_000122 | YIL143C      | SPAC17A5.06(B)   | LinJ.32.4070(B)  | LmjF.32.3920(B) | Tb927.3.5100(H)<br>Tb11.01.7950(Y) | Tc00.1047053511527.20(B)  |
| TFIIH-XPB (ERCC2/p80/Rad3)       | Transcription factor : DNA unwinding                                                      | NM_000400 | YER171W      | SPAC1D4.12(B)    | LinJ.24.2370(B)  | LmjF.24.2280(B) | Tb927.8.5980(B)                    | Tc00.1047053511075.30(B)  |
| TFIIH-Tfb1 (p62, GTF2H1)         | Transcription factor : DNA unwinding                                                      | NM_005316 | YDR311W      | SPAC16E8.11c(B)  | X                | X               | Tb11.01.1200                       | X                         |
| TFIIH-Tfb2 (p52,GTF2H4)          | Transcription factor : DNA unwinding                                                      | NM_001517 | YPL122C      | SPBC13G1.13(B)   | LinJ.36.0860(B)  | LmjF.36.0800(B) | Tb927.10.5210(B)                   | Tc00.1047053510297.80(B)  |
| TFIIH-Ssl1 (p44, GTF2H2)         | Transcription factor : DNA unwinding                                                      | NM_001515 | YLR005W      | SPCC1682.07(B)   | LinJ.24.1750(B)  | LmjF.24.1680(B) | Tb927.8.6540(B)                    | X                         |
| TFIIH-TSP1                       | Trypanosomatid-specific compenent of TFIIH                                                | X         | X            | X                | LinJ.20.0470     | LmjF.20.0400    | Tb927.1.1080                       | Tc00.1047053511423.40     |
| TFIIH-TSP2                       | Trypanosomatid-specific compenent of TFIIH                                                | X         | X            | X                | LinJ.32.0910     | LmjF.32.0860    | Tb11.01.5700                       | TcIL3000.11.14400         |
| TFIIH-Tfb4 (p34, GTF2H3)         | Transcription factor : DNA unwinding                                                      | NM_001516 | YPR056W      | SPBC30B4.07c(B)  | X                | X               | Tb11.01.7730                       | X                         |
| TFIIH-Tfb5                       | Trypanosomatid-specific compenent of TFIIH                                                | X         | X            | X                | X                | X               | Tb10.61.2600                       | X                         |
| XPG (ERCC5, p135, Rad2)          | Xeroderma pigmentosum G : 3'-incision of the lesion                                       | NM_000123 | YGR258C      | SPBC3E7.08c(B)   | LinJ.35.3640(B)  | LmjF.35.3590(B) | Tb09.211.2870(B)                   | Tc00.1047053507009.120(B) |
| ERCC1 (p33, Rad10)               | Structure-specific DNA repair endonuclease for the 5'-incision                            | NM_001983 | YML095C      | SPBC4F6.15c (B)  | X                | X               | Tb927.7.2060 (H)                   | Tc00.1047053510165.20 (H) |
| XPF (ERCC4,p112,Rad1)            | Xeroderma pigmentosum F : 5'-incision of the lesion                                       | NM_005236 | YPL022W      | SPCC970.01(B)    | LinJ.08.0150(B)  | LmjF.08.0140(B) | Tb927.5.3670(B)                    | Tc00.1047053509779.10(B)  |
| RPA1 ( p70)                      | Replication protein A 1 : ssDNA binding heterotrimer                                      | NM_002945 | YAR007C      | SPBC660.13c(B)   | LinJ.28.1940(B)  | LmjF.28.1820(B) | Tb11.01.0870(B)                    | X                         |
| RPA2 ( p32)                      | Replication protein A 2 : ssDNA binding heterotrimer                                      | NM_002946 | YNL312W      | SPCC1753.01c (B) | LinJ.15.0310 (H) | LmjF.15.0270(H) | Tb927.5.1700 (B)                   | X                         |
| RPA3 ( p11)                      | Replication protein A 3 : ssDNA binding heterotrimer                                      | NM_002947 | YJL173C      | X                | X                | X               | X                                  | X                         |
| Pole                             | DNA polymerase filling the gap                                                            | NM_006231 | YNL262W      | SPBC25H2.13c(B)  | LinJ.35.4430(B)  | LmjF.35.4360(B) | Tb09.211.1820(B)                   | Tc00.1047053506147.180(B) |
| PoIδ                             | DNA polymerase filling the gap                                                            | NM_002691 | YDL102W      | SPBC336.04(B)    | LinJ.33.1790(B)  | LmjF.33.1690(B) | Tb927.2.1800(B)                    | Tc00.1047053510259.6(B)   |
| LIG I (CDC9)                     | DNA ligase I : ligation                                                                   | NM_000234 | YDL164C      | SPAC20G8.01(B)   | LinJ.30.3490(B)  | LmjF.30.3440(B) | Tb927.6.4780(B)                    | Tc00.1047053506945.80(B)  |
| DDB1 ( XPE, p127)                | Damaged DNA binding 1 : heterodimer involved in damage recognition and stimulate excision | NM_001923 | X            | SPAC17H9.10c(H)  | LinJ.30.3770(H)  | LmjF.30.3710(H) | Tb927.6.5110(H)                    | Tc00.1047053509165.49(H)  |
| DDB2 (p48)                       | Damaged DNA binding 2 : heterodimer involved in damage recognition and stimulate excision | NM_000107 | YDL156W      | X                | X                | X               | X                                  | X                         |
| CSA (ERCC8, Rad28)               | Cockayne's syndrome A:E3 ubiquitin-protein ligase complex                                 | NM_000082 | YDR030C      | SPBC577.09(B)    | LinJ.23.1400(Y)  | X               | X                                  | X                         |
| CSB (ERCC6, Rad26)               | Cockayne's syndrome B : Responsible for ubiquitination and proteolysis of RNAPII          | NM_000124 | YJR035W      | SPCP25A2.02c(B)  | LinJ.14.0900(B)  | LmjF.14.0840(B) | Tb927.7.4080(B)                    | Tc00.1047053508675.20(B)  |
| Def1                             | Responsible for ubiquitination and proteolysis of RNAPII                                  | NM_004084 | YKL054C      | SPBC354.10(Y)    | X                | X               | X                                  | X                         |
| HuF2 (TTF2)                      | Human homolog of factor 2 : release RNAPI and II stalled in TCR                           | NM_003594 | YBR114W      | SPBC582.10c(H)   | LinJ.28.0810(H)  | LmjF.28.0760(H) | Tb11.010530(H)                     | X                         |

(H) represents found from human homolog only

(Y) represents found from yeast homolog only

(B) means both found from human and yeast homologs

(X) means no homolog



**Table S3** List of others Trypanosomatids genes involved in DNA repair included functions and ID.

| Name ( other name)           | Fonction                                                                                                       | Gene ID      |             |                                      |                  |                  |                   |                            |
|------------------------------|----------------------------------------------------------------------------------------------------------------|--------------|-------------|--------------------------------------|------------------|------------------|-------------------|----------------------------|
|                              |                                                                                                                | Human        | Scerevisiae | S.pombe                              | L.infantum       | L.major          | T.brucei          | T.cruzi                    |
| 53BP1(Crb2, Rad9)            | Topoisomerase binding protein 1 : DNA damage sensor, limit resection                                           | NM_001141980 | X           | SPBC342.05 (H)                       | X                | X                | X                 | X                          |
| ATM (Tel1)                   | Ataxia-telangiectesia-mutated kinase: checkpoint-specific damage sensor                                        | NM_000051    | YBL088C     | SPCC23B6.03c (B)                     | LinJ.02.0100 (B) | LmjF.02.0120 (B) | Tb927.2.2260 (B)  | Tc00.1047053506533.34 (B)  |
| ATR (Rad3, Mec1)             | ATR and Rad3-related kinase : checkpoint-specific damage sensor                                                | NM_001184    | YBR136W     | SPBC216.05 (B)                       | LinJ.32.1520 (B) | LmjF.32.1460 (B) | Tb11.01.6300 (B)  | Tc00.1047053506223.120 (B) |
| ATRIP (Rad26,Dcd2/Lcd1/Pie1) | ATR interacting protein : recruit ATR                                                                          | NM_130384    | YDR499W     | X                                    | X                | X                | X                 | X                          |
| Chk1                         | Checkpoint kinase 1 : Effector kinase, an ATR substrat                                                         | NM_001274    | YBR274W     | SPCC1259.13 (B)                      | X                | X                | X                 | X                          |
| Chk2 (Cds1, Rad53)           | Checkpoint kinase 2 : Effector kinase, an ATM substrat                                                         | NM_007194    | YPL153C     | SPCC18B5.11c (B)                     | LinJ.17.0070 (Y) | LmjF.17.0060 (Y) | Tb927.7.6220 (Y)  | X                          |
| Claspin (Mrc1)               | Sensor which monitors the integrity of DNA replication fork                                                    | NM_022111    | YCL061C     | SPAC694.06c (B)                      | X                | X                | X                 | X                          |
| Hus1 (Mec3)                  | Hydroxyurea sensitive 1 : heterotrimeric 9-1-1 checkpoint complex, subunits of PCNA-like sensor of damaged DNA | NM_004507    | YLR288      | SPAC20G4.04c (H)<br>SPBC27B12.05 (Y) | X                | X                | X                 | Tc00.1047053466823.10 (H)  |
| MDC1 (NFBBD1)                | Mediator of DNA-damage checkpoint 1                                                                            | NM_014641    | X           | SPBC582.05c (H)                      | LinJ.34.4070 (H) | LmjF.34.4240 (H) | X                 | X                          |
| p53                          | Tumor suppressor protein 53: regulation of the cell cycle                                                      | NM_000546    | X           | X                                    | X                | X                | X                 | X                          |
| PARP-1                       | Poly (ADP) ribose polymerase-1 : sensor of DNA strand break                                                    | NM_001618    | X           | SPBC2A9.07c (H)                      | LinJ.25.0770     | LmjF.25.0740     | Tb927.5.3050 (H)  | Tc00.1047053510173.90 (H)  |
| PARP-2                       | Poly (ADP) ribose polymerase-2 : sensor of DNA strand break                                                    | NM_005484    | X           | X                                    | X                | X                | X                 | X                          |
| PARP-3                       | Poly (ADP) ribose polymerase-3 : sensor of DNA strand break                                                    | NM_001003931 | X           | X                                    | X                | X                | X                 | X                          |
| PARG                         | Poly(ADP-ribose) glycohydrolase which rapidly degrades PARG                                                    | NM_003631    | X           | X                                    | X                | X                | Tb09.211.3760 (H) | Tc00.1047053507013.24 (H)  |
| Polk                         | Translesion synthesis polymerase kappa                                                                         | NM_016218    | YOR346W     | SPCC553.07c (H)                      | LinJ.28.1540 (H) | LmjF.28.1420 (H) | Tb11.01.0040 (H)  | Tc00.1047053503755.30 (H)  |
| Polη                         | Translesion synthesis polymerase                                                                               | NM_181808    | X           | X                                    | LinJ.34.1370 (H) | LmjF.34.1260 (H) | Tb927.4.2950 (H)  | Tc00.1047053506265.30 (H)  |
| Polζ                         | Translesion synthesis polymerase zeta consisting of REV3 and REV 7 subunits                                    | NM_002912    | YPL167C     | SPAC688.10 (B)                       | LinJ.23.1590 (B) | LmjF.23.1330 (B) | Tb927.8.3290 (B)  | Tc00.1047053509769.130 (B) |
| Rad1(Rad17)                  | Heterotrimeric 9-1-1 checkpoint complex : subunits of PCNA-like sensor of damaged DNA                          | NM_002853    | YOR368W     | SPAC1952.07 (B)                      | X                | X                | Tb927.1.1060 (Y)  | X                          |
| Rad18                        | PCNA monoubiquitination in complex with Rad6 at replication fork stalled                                       | NM_020165    | YCR066W     | SPBC1734.06 (B)                      | LinJ.17.0340 (Y) | LmjF.17.0290 (Y) | Tb927.7.6370 (Y)  | Tc00.1047053504035.130 (Y) |
| Rad6A(UBE2A)                 | PCNA monoubiquitination in complex with Rad18 at replication fork stalled                                      | NM_003336    | YGL058W     | SPAC18B11.07c (B)                    | LinJ.22.0480 (B) | LmjF.22.0610 (B) | Tb927.8.6090 (Y)  | Tc00.1047053506859.10 (B)  |
| Rad6B(UBE2B)                 | PCNA monoubiquitination in complex with Rad18 at replication fork stalled                                      | NM_003337    | YGL058W     | SPAC18B11.07c (H)                    | LinJ.22.0480 (H) | LmjF.22.0610 (H) | X                 | Tc00.1047053506859.10 (H)  |
| Rad9 (Ddc1)                  | Heterotrimeric 9-1-1 checkpoint complex : subunits of PCNA-like sensor of damaged DNA                          | NM_004584    | YDR217C     | SPAC664.07c (H)<br>SPBC342.05 (Y)    | LinJ.15.1040 (H) | X                | X                 | Tc00.1047053505843.30 (H)  |
| Rev1                         | Translesion synthesis polymerase                                                                               | NM_016316    | YOR346W     | SPBC1347.01c (B)                     | LinJ.36.0110 (B) | LmjF.36.0100 (B) | Tb927.10.4480 (B) | Tc00.1047053510963.10 (B)  |
| TopBP1(Cut5, Dpb11)          | Topoisomerase-binding protein 1: activation of ATR                                                             | NM_007027    | YJL090C     | SPAC23C4.18c (B)                     | LinJ.29.1910 (H) | LmjF.29.1790 (H) | Tb927.3.4350 (H)  | Tc00.1047053509767.200 (H) |

(H) represents found from human homolog only

(Y) represents found from yeast homolog only

(B) means both found from human and yeast homologs

(X) means no homolog
